# Supplementary material
Source: PubMed Central journal article supplement (PMC2776083)
Supplement: NIHMS104040-supplement-1_si_001.pdf [file NIHMS104040-supplement-1_si_001.pdf]

**Supplemental Figures 1a-c:** Structures of chemicals displayed in Table 1.

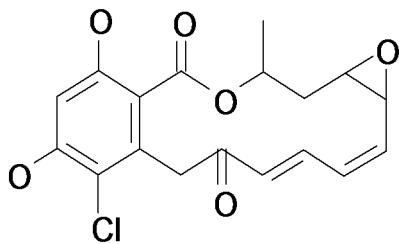

Radicicol

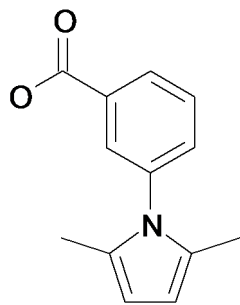

CB 5128773

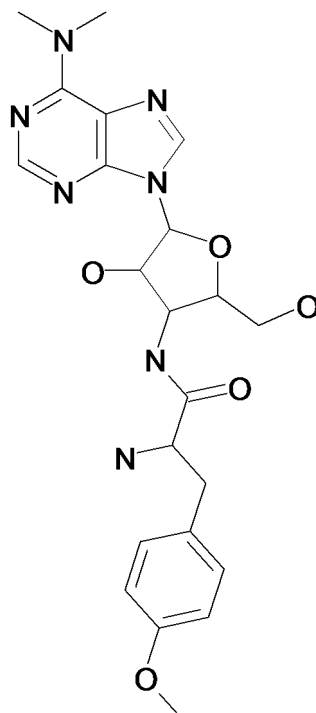

Puromycin

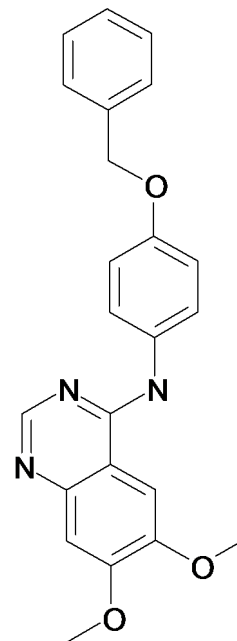

EGFR/ErbB-2 Inhibitor

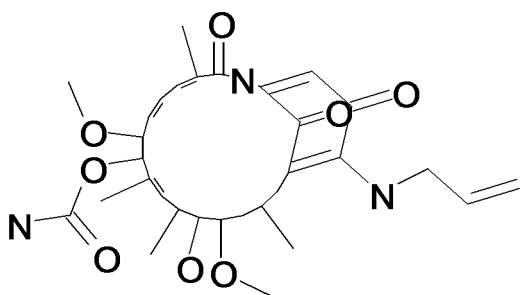

17-AAG

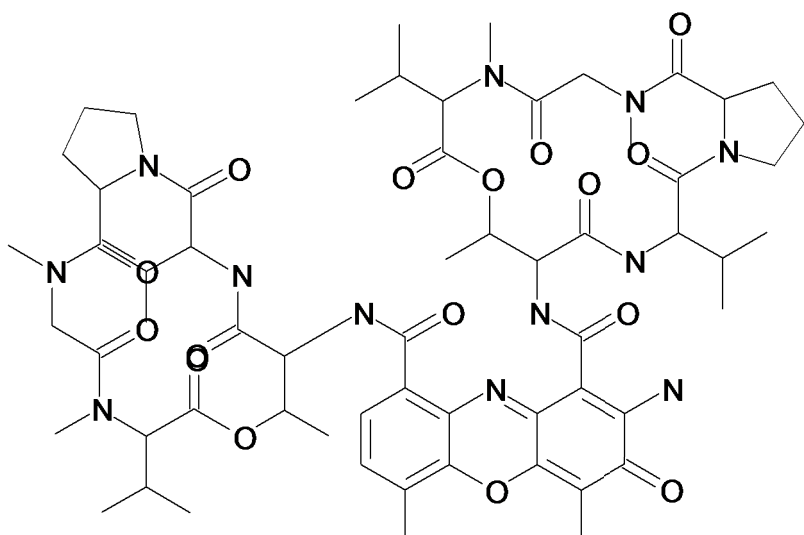

Actinomycin D

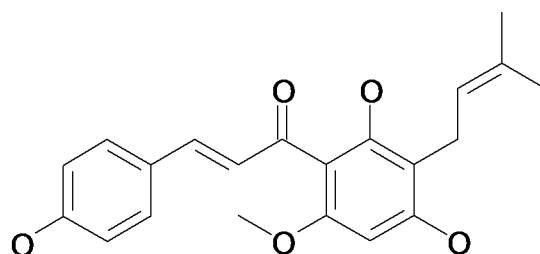

Xanthohumol

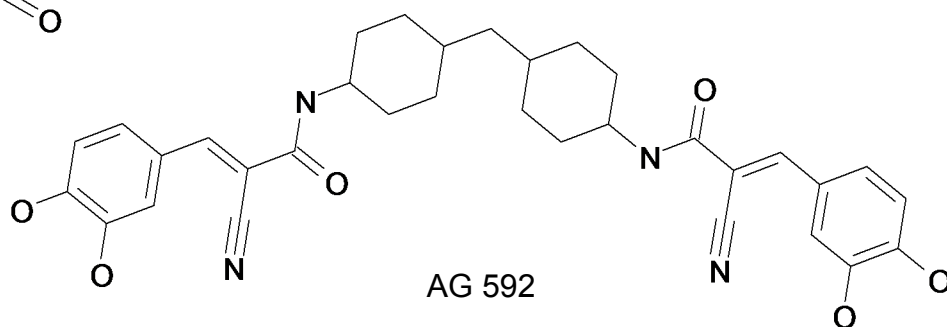

AG 592

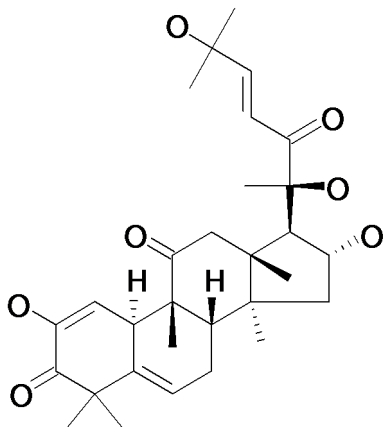

Cucurbitacin I

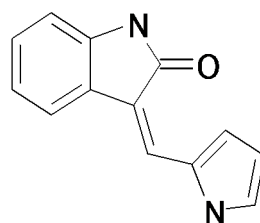

Oxindole I

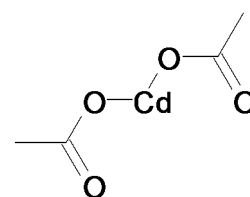

Cadmium acetate

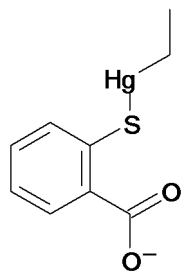

Thimerosal

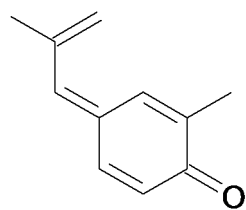

Retusoquinone

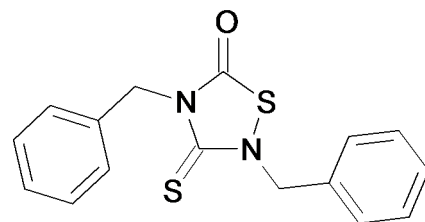

GSK-3b Inhibitor III

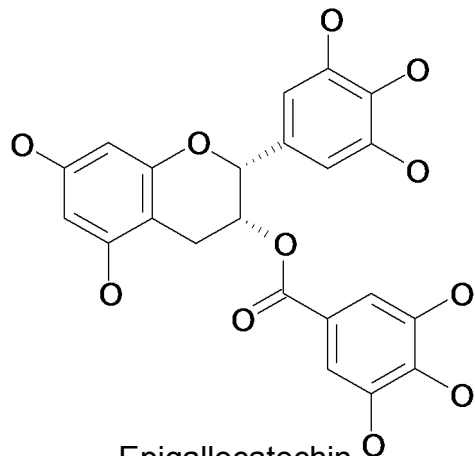

Epigallocatechin-3-monogallate

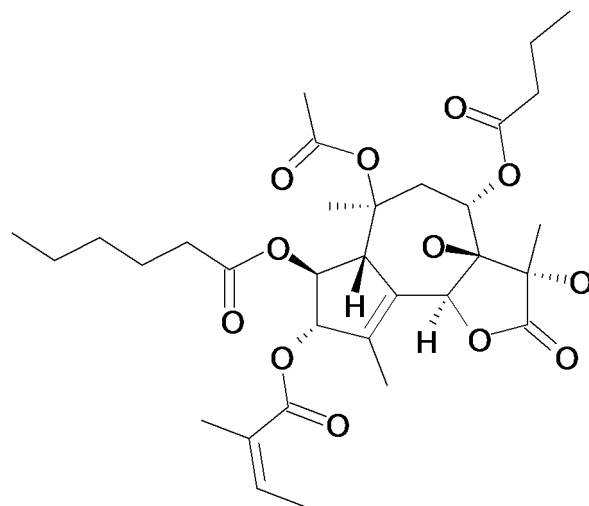

Thapsigargin

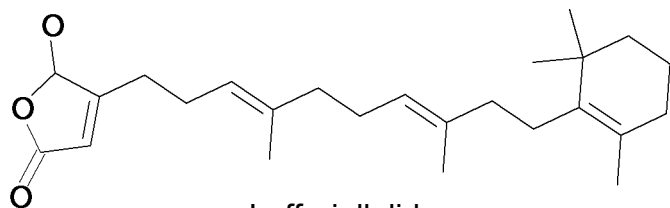

Luffariellolide

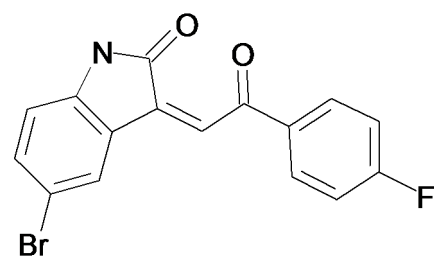

WR 216174

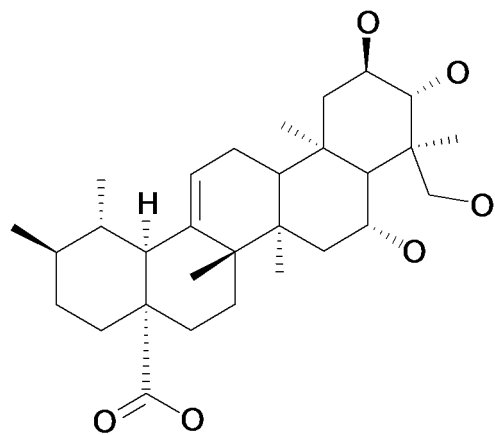

Madecassic acid

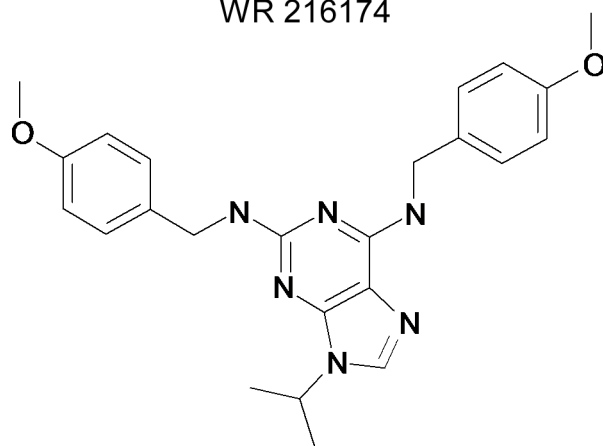

Myoseverin

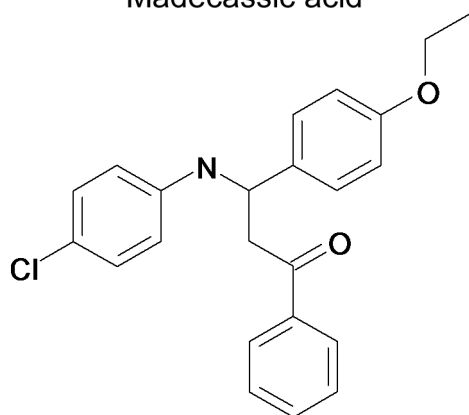

CB 5404078

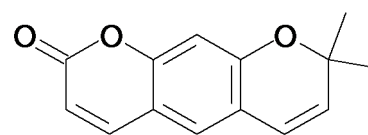

Xanthyletin

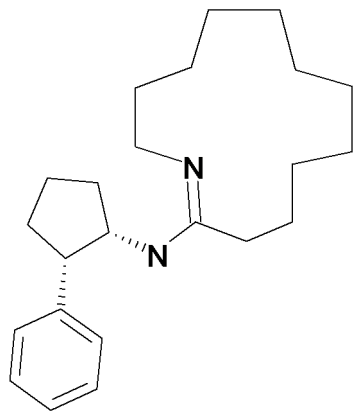

MDL-12,330A, HCl

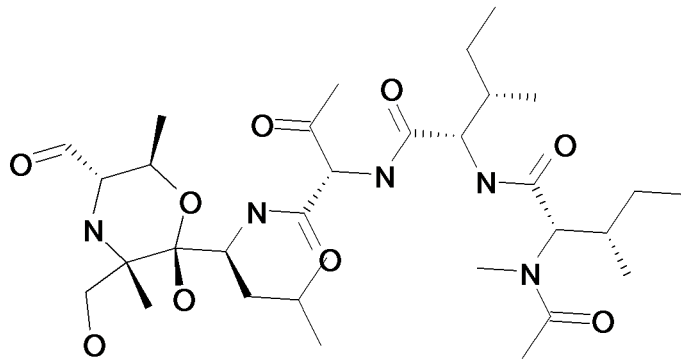

Epoxomicin

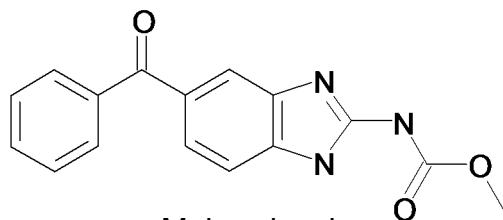

Mebendazole

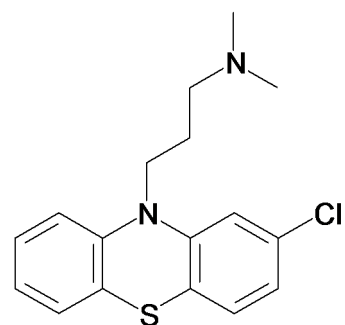

Chlorpromazine

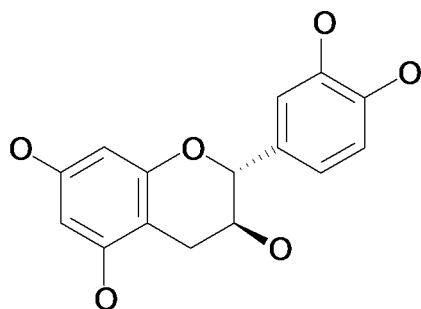

Catechin

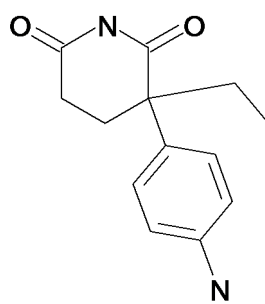

Glutethinide

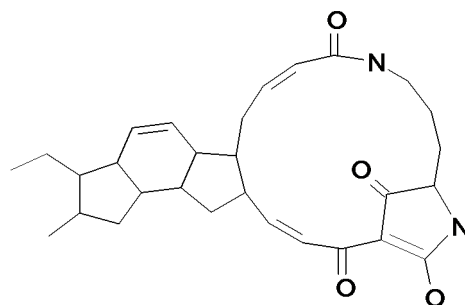

Ikarugamycin

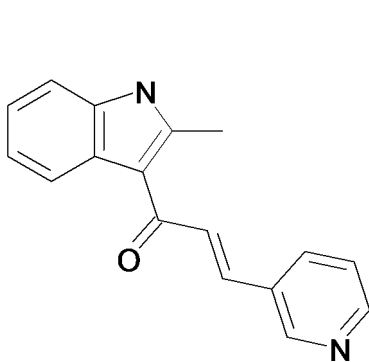

CB 5255637

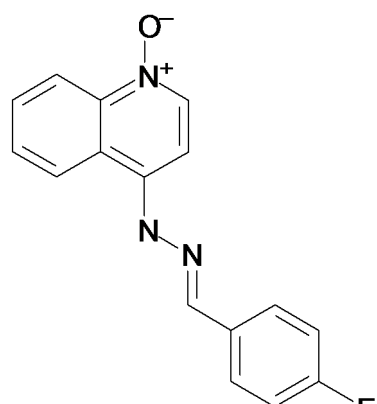

CB 5213395

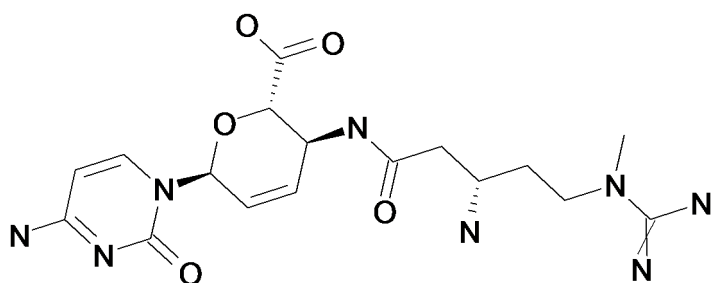

Blasticidine S

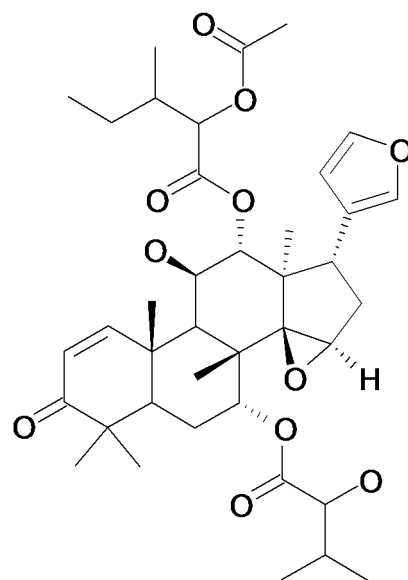

Heudelottin C
